# Supplementary material for: Synthesis, structure and photochromic properties of hybrid molecules based on fullerene C60 and spiropyrans
Source: Royal Society of Chemistry journal article supplement (doi:10.1039/c6ra18073f), 2016-01-01
Supplement: c6ra18073f1.pdf [file c6ra18073f1.pdf]

## Supporting Information

### Synthesis, structure and photochromic properties of hybrid molecules based on fullerene C<sub>60</sub> and spiropyrans

A.R. Tuktarov,<sup>1</sup> A.A. Khuzin,<sup>1</sup> A.R. Tulyabaev,<sup>1</sup> O.V. Venidictova,<sup>2</sup> T.M. Valova,<sup>2</sup> V.A. Barachevsky,<sup>2</sup> L.M. Khalilov,<sup>1</sup> U.M. Dzhemilev<sup>1</sup>

<sup>1</sup> *Institute of Petrochemistry and Catalysis, Russian Academy of Sciences  
141 Prospekt Oktyabrya, Ufa, 450075, Russia*

<sup>2</sup> *Photochemistry Center, Russian Academy of Science  
7a, bld.1, Ul. Novatorov, Moscow, 119421, Russia*

#### TABLE OF CONTENTS

| Contents                                                  | Page number |
|-----------------------------------------------------------|-------------|
| 1) General considerations, and experimental procedures    | 2           |
| 2) <sup>1</sup> H, <sup>13</sup> C, HSQC and HMBC spectra | 4           |
| 3) Spectral-kinetic studies                               | 13          |

**General considerations.** Commercially available [60]fullerene (99.5% pure, Sigma-Aldrich) was used. Spiropyrans were prepared by standard procedures. The reaction products were analyzed on a HPLC chromatograph HEWLETT PACKARD (model HP 1090 Liquid Chromatograph) at 340 nm. The mixtures were separated on a metal preparative column Cosmosil Buckyprep Waters (250×10 mm) at ~20 °C. Toluene was used as eluent, the flow rate was 3.0 mL·min<sup>-1</sup>. The <sup>1</sup>H and <sup>13</sup>C NMR spectra were run on a Bruker Avance-500 spectrometer at 500.17 and 125.78 MHz, respectively. The mixture of CDCl<sub>3</sub> and CS<sub>2</sub> (1:5) was used as a solvent. The mass spectra were obtained on UltraFlex III TOF/TOF (Bruker Daltonik GmbH, Germany) operating in a linear mode. S<sub>8</sub> was used as a matrix. For the application on a metal target, the toluene solutions of the samples were used.

**General synthetic procedure of the preparation of pyrrolidinofullerenes 4-6.** To a solution of 0.1 g (0.139 mmol) of C<sub>60</sub> in 15 ml of chlorobenzene 0.025 g (0.278 mmol) of sarcosine and 0.695 mmol of corresponding spiropyran aldehyde **1-3** were added. The resulting mixture was heated for two hours at 100-110 °C. The reaction products **4-6**, and the starting fullerene C<sub>60</sub> were separated by the semi-preparative HPLC, eluent was toluene.

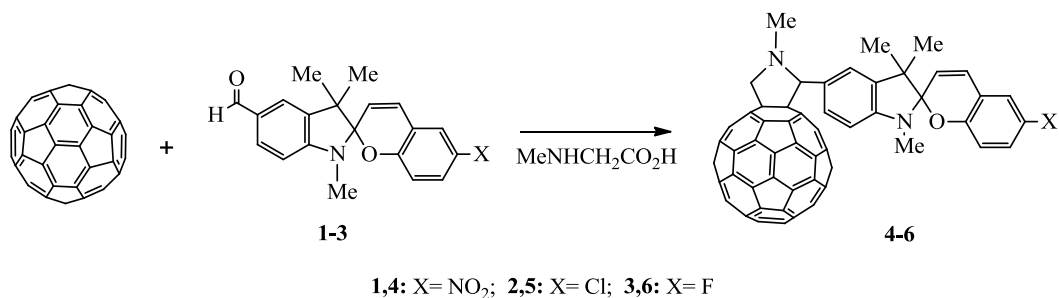

**Spectral-kinetic studies.** Spectrophotometric measurements for solutions were carried out on a CARY 50bio spectrophotometer (Varian) in a quartz cell (KU-1 quartz) with optical path length of 2 mm. The photochromic properties of **1-4** were studied at room temperature for solutions with the molar concentration  $c = 2 \cdot 10^{-4}$  M. For photochemical studies, solutions were irradiated with a L8253 xenon lamp included in an LC-4 radiation unit (Hamamatsu) at a medium radiation power through color glass filter UFS-1. The UFS -1 optical filter transmits UV irradiation into the spectral range of 235-400 nm. UV light powers through UFS -1 optical filter and without it were 49 and 66,5 W/m<sup>2</sup>. To study the photodegradation using unfiltered light in the presence of air oxygen. A series of experiments was carried out at a lower temperature. The solution was cooled in a freezer until the solution temperature -1 ÷ + 5° C and irradiated «NORMA» light flash lamp in a quartz cuvette 0.2 cm thick. Absorption spectra and kinetics of photochromic

transformations were recorded at intervals of 1 ms, using fiber optic USB-2000 spectrometer with a multichannel detector company Ocean Optics.

Also studied samples of amorphous films photochromic monomer and hybrid molecules. Amorphous films were prepared by single-watering the concentrated solutions of the compounds in chloroform onto quartz glass. After drying at room temperature, samples finally dried in an oven at 50 ° C for 30 min.

**Pyrrolidinofullerene 4.** IR: 526, 710, 953, 1061, 1089, 1123, 1271, 1379, 1464, 1479, 1492, 1518, 1578  $\text{cm}^{-1}$ . UV ( $\text{CHCl}_3$ ),  $\lambda_{\text{max}}$ , nm: 256, 326, 427.  $^1\text{H}$  NMR (500 MHz,  $\text{CDCl}_3$ ):  $\delta$  1.26 (s, 3H,  $\text{CH}_3$ ), 1.39 (s, 3H,  $\text{CH}_3$ ), 2.78 (s, 3H,  $\text{CH}_3$ ), 2.92 (s, 3H,  $\text{CH}_3$ , N-Me pyrrolidine), 4.30 (d, H,  $\text{CH}_2$ , pyrrolidine,  $J = 9.0$ ), 4.94 (s, 1H, CH, pyrrolidine), 5.00 (d, H,  $\text{CH}_2$ , pyrrolidine,  $J = 9.0$ ), 5.83 (d, 1H, CH, pyran,  $J = 10.0$ ), 6.79 (d, 1H, CH,  $J = 10.0$ ), 6.96 (d, 1H, CH, pyran,  $J = 10.0$ ), 7.99 (d, 1H, CH, indole,  $J = 8.0$ ), 8.03 (s, 1H, CH, indole), 8.04 (d, 1H, CH, indole,  $J = 8.0$ ), 8.05 (s, 1H, CH).  $^{13}\text{C}$  NMR (125 MHz,  $\text{CDCl}_3$ ):  $\delta$  19.99, 25.47, 25.76, 28.87, 28.96, 40.15, 52.19, 68.82, 70.11, 77.83, 77.95, 83.73, 106.29, 106.44, 115.39, 115.45, 118.62, 121.44, 122.82, 125.91, 128.39, 128.52, 135.96, 136.41, 136.52, 136.57, 136.62, 139.34, 139.42, 139.95, 140.21, 140.29, 141.09, 141.13, 141.68, 141.75, 141.89, 142.03, 142.10, 142.18, 142.24, 142.34, 142.68, 142.78, 143.09, 143.29, 144.43, 144.48, 144.72, 144.78, 145.19, 145.29, 145.36, 145.48, 145.52, 145.55, 145.58, 145.69, 145.83, 145.85, 145.99, 146.18, 146.24, 146.28, 146.37, 146.59, 146.99, 147.33, 147.36, 147.77, 153.62, 153.68, 154.06, 154.23, 156.45, 156.50, 159.44, 159.47. MALDI TOF:  $m/z$  found 1096.1  $[\text{M-H}]^-$ .

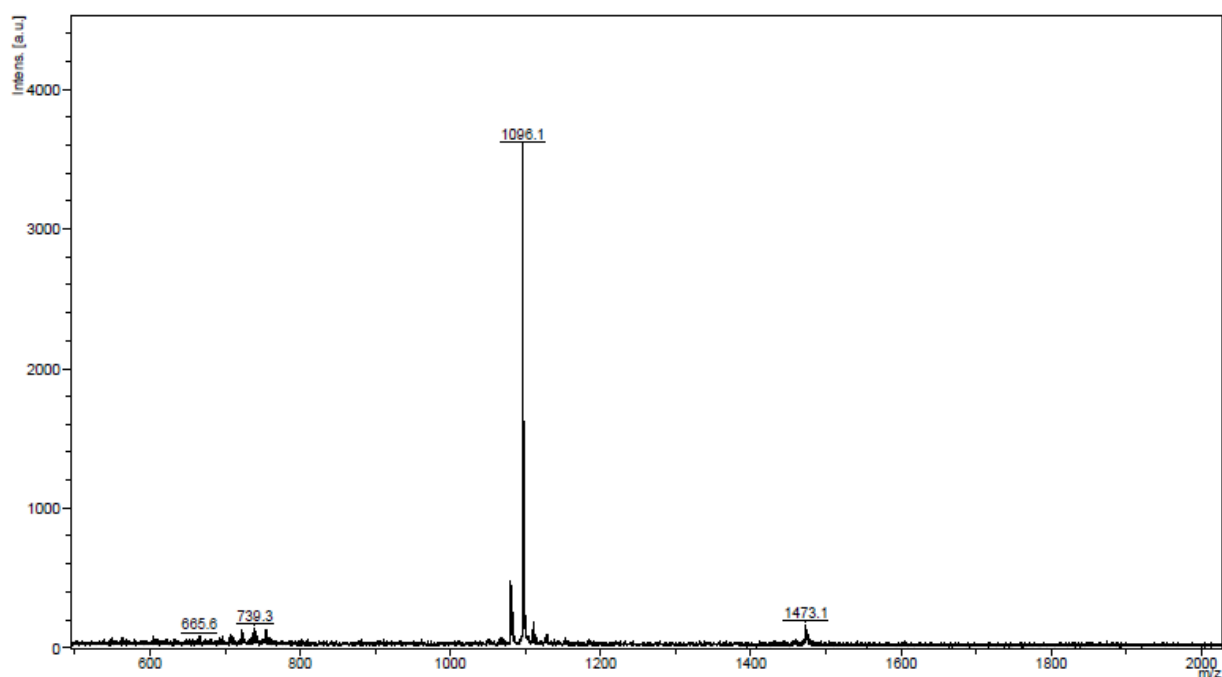

Figure 1. Mass spectra MALDI TOF of compound **4** (matrix –  $\text{S}_8$ ).

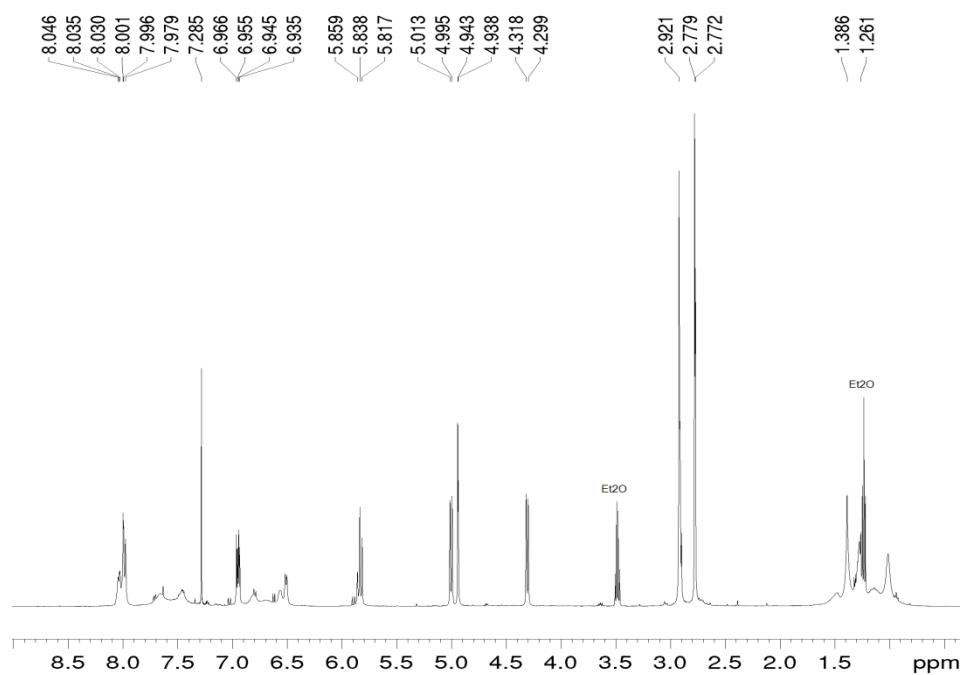

Figure 2. The  $^1\text{H}$  NMR spectrum of compound **4** (500.17 MHz, solvent  $\text{CS}_2 : \text{CDCl}_3 = 5:1$ )

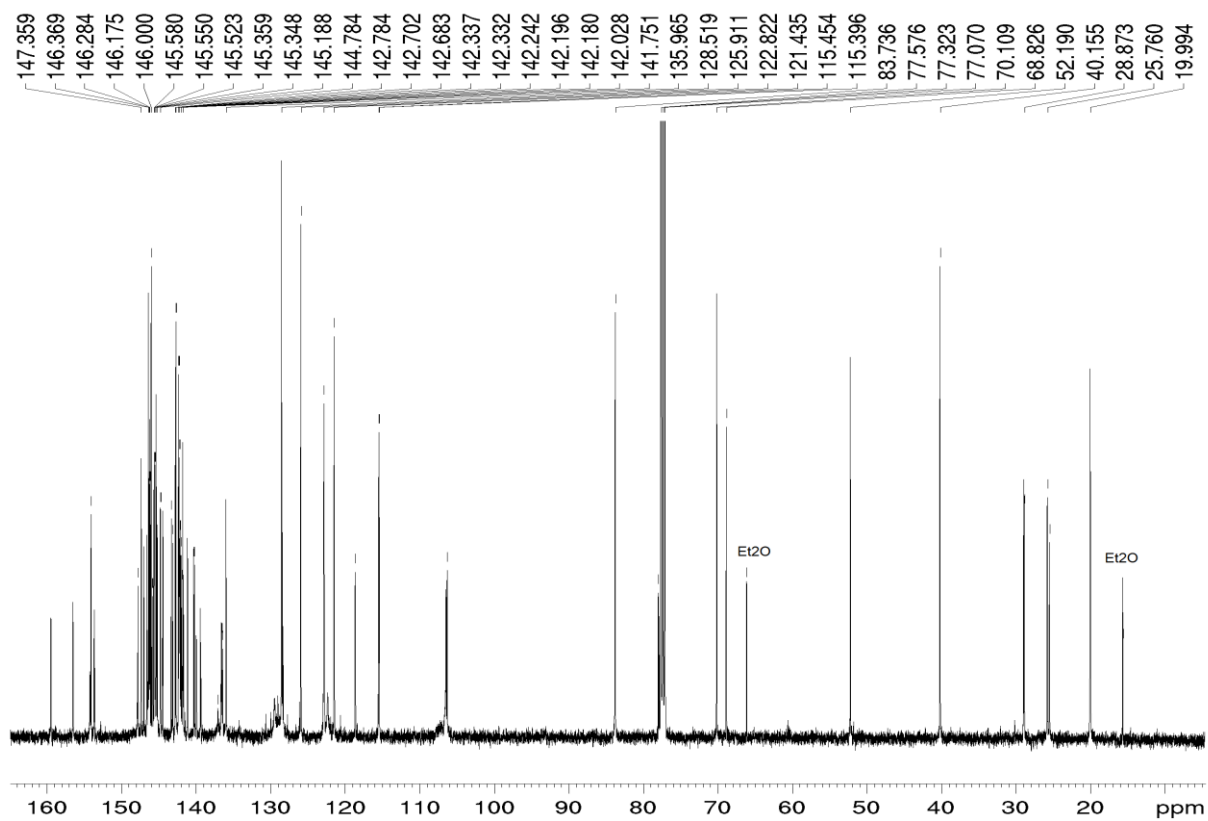

Figure 3. The  $^{13}\text{C}$  NMR spectrum of compound **4** (125.78 MHz, solvent  $\text{CS}_2 : \text{CDCl}_3 = 5:1$ )

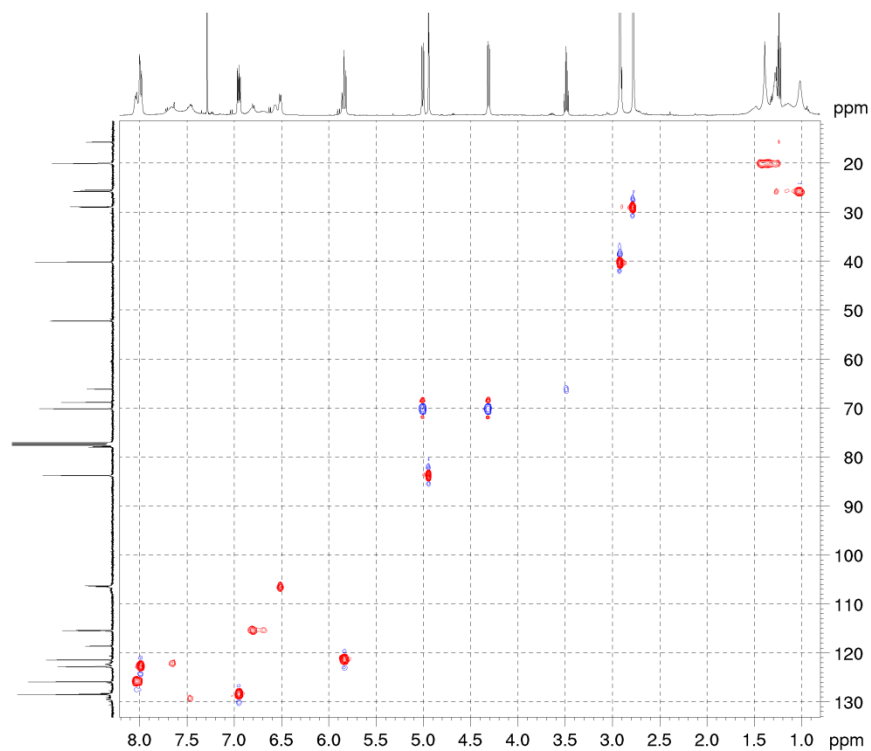

Figure 4. The HSQC spectrum of compound **4** (500.17 MHz for  $^1\text{H}$ , 125.78 MHz for  $^{13}\text{C}$ , solvent  $\text{CS}_2 : \text{CDCl}_3 = 5:1$ )

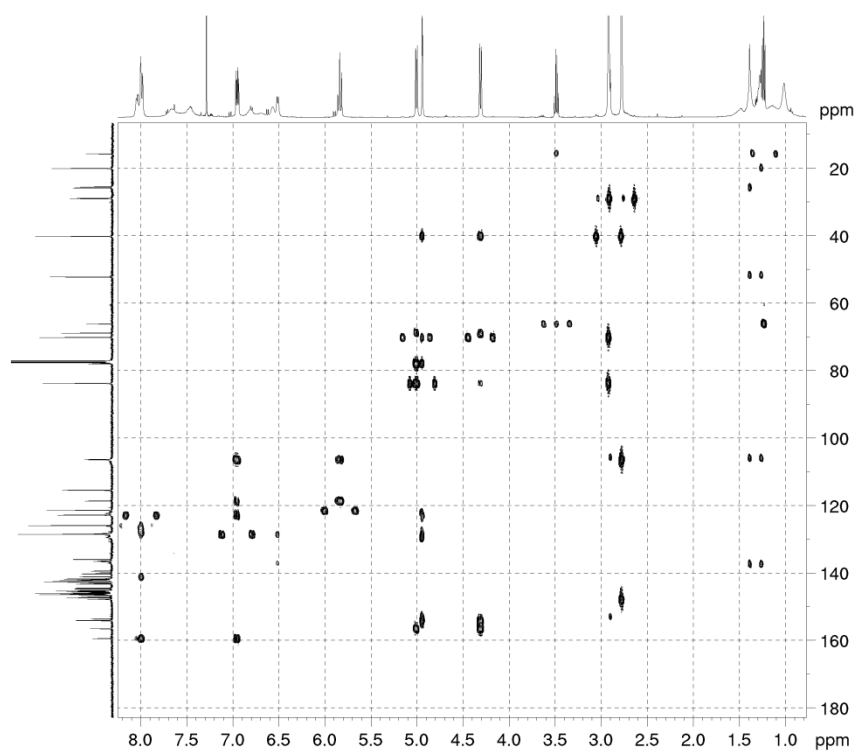

Figure 5. The HMBC spectrum of compound **4** (500.17 MHz for  $^1\text{H}$ , 125.78 MHz for  $^{13}\text{C}$ , solvent  $\text{CS}_2 : \text{CDCl}_3 = 5:1$ )

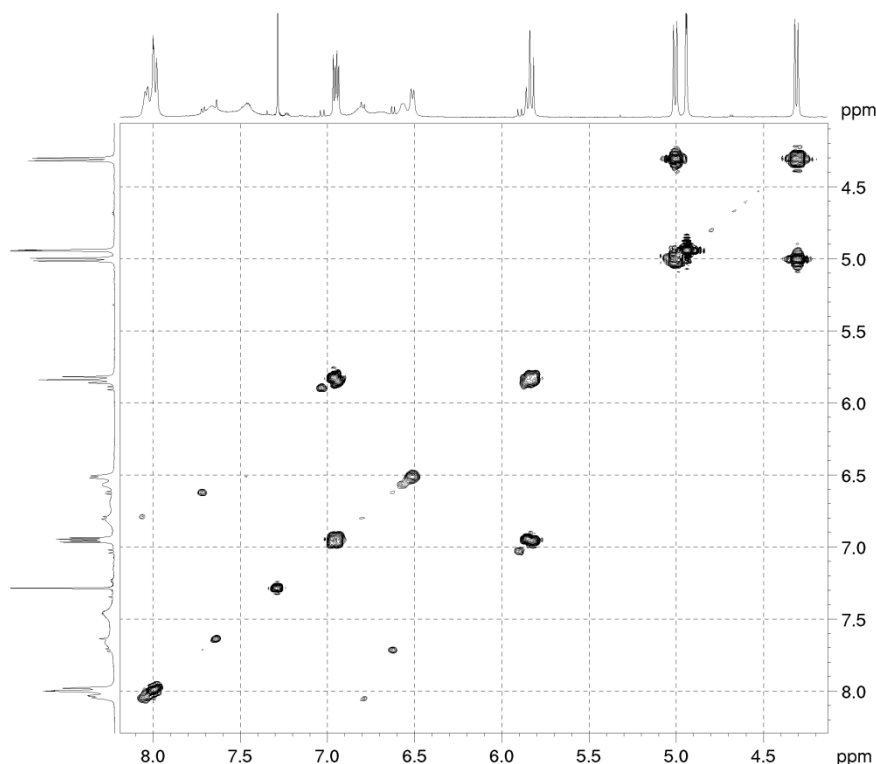

Figure 6. The H-H COSY spectrum of compound **4** (500.17 MHz for  $^1\text{H}$ , solvent  $\text{CS}_2 : \text{CDCl}_3 = 5:1$ )

**Pyrrolidinofullerene 5.** IR: 526, 731, 962, 1122, 1179, 1260, 1464, 1476, 1491  $\text{cm}^{-1}$ . UV ( $\text{CHCl}_3$ ),  $\lambda_{\text{max}}$ , nm: 255, 327, 430.  $^1\text{H}$  NMR (500 MHz,  $\text{CDCl}_3$ ):  $\delta$  1.26 (s, 3H,  $\text{CH}_3$ ), 1.36 (s, 3H,  $\text{CH}_3$ ), 2.74 (s, 3H,  $\text{CH}_3$ ), 2.91 (s, 3H,  $\text{CH}_3$ , N-Me pyrrolidine), 4.29 (d, H,  $\text{CH}_2$ , pyrrolidine,  $J = 9.0$ ), 4.92 (s, 1H, CH, pyrrolidine), 4.99 (d, H,  $\text{CH}_2$ , pyrrolidine,  $J = 9.0$ ), 5.70 (d, 1H, CH, pyran,  $J = 10.0$ ), 6.79 (d, 1H, CH,  $J = 10.0$ ), 6.98 (d, 1H, CH, pyran,  $J = 10.0$ ), 7.22 (d, 1H, CH, indole,  $J = 8.0$ ), 7.29 (s, 1H, CH, indole), 7.44 (s, 1H, CH), 7.45 (d, 1H, CH, indole,  $J = 8.0$ ).  $^{13}\text{C}$  NMR (125 MHz,  $\text{CDCl}_3$ ):  $\delta$  20.16, 25.46, 25.74, 28.89, 28.98, 40.12, 51.75, 68.83, 70.11, 77.89, 78.02, 83.83, 104.45, 104.61, 116.33, 116.37, 119.99, 120.51, 125.19, 126.39, 126.43, 127.69, 127.75, 128.73, 129.56, 130.61, 135.91, 135.95, 136.00, 136.37, 136.49, 136.64, 136.70, 139.41, 139.46, 139.96, 140.16, 140.18, 140.27, 141.68, 141.77, 141.78, 141.92, 142.04, 142.07, 142.09, 142.11, 142.19, 142.23, 142.34, 142.36, 142.66, 142.76, 143.07, 143.27, 144.45, 144.77, 145.17, 145.29, 145.32, 145.46, 145.49, 145.52, 145.54, 145.58, 145.68, 145.84, 145.87, 145.98, 146.15, 146.22, 146.28, 146.35, 146.47, 146.62, 147.05, 147.33, 148.12, 152.82, 152.87, 153.75, 153.82, 154.12, 154.37, 156.50, 156.56. MALDI TOF:  $m/z$  found 1085.1  $[\text{M}-\text{H}]^-$ .

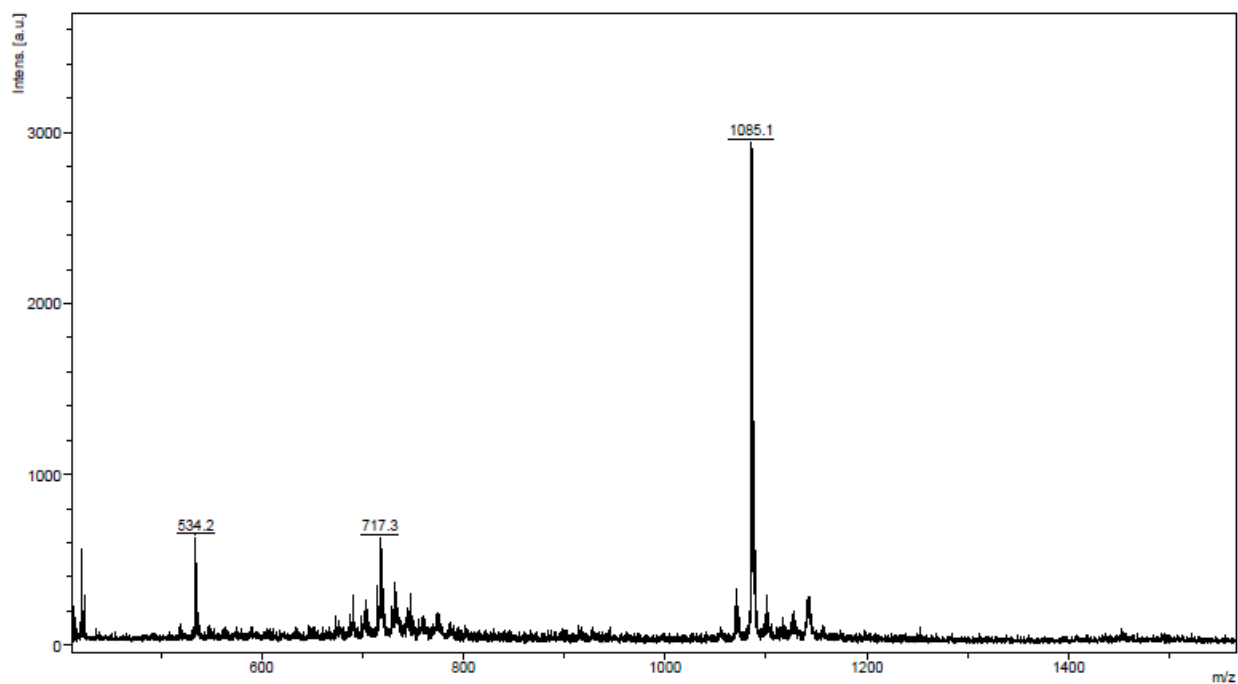

Figure 7. Mass spectra MALDI TOF of compound **5** (matrix –  $S_8$ ).

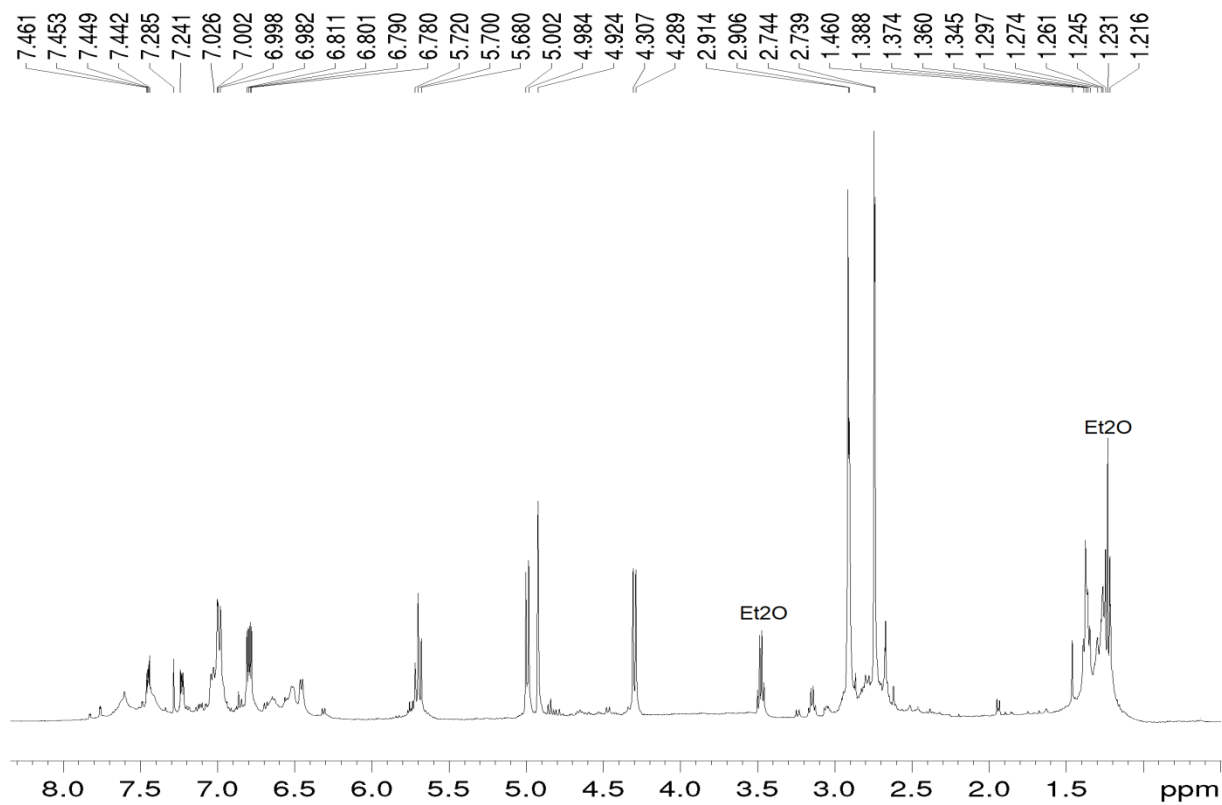

Figure 8. The  $^1\text{H}$  NMR spectrum of compound **5** (500.17 MHz, solvent  $\text{CS}_2 : \text{CDCl}_3 = 5:1$ )



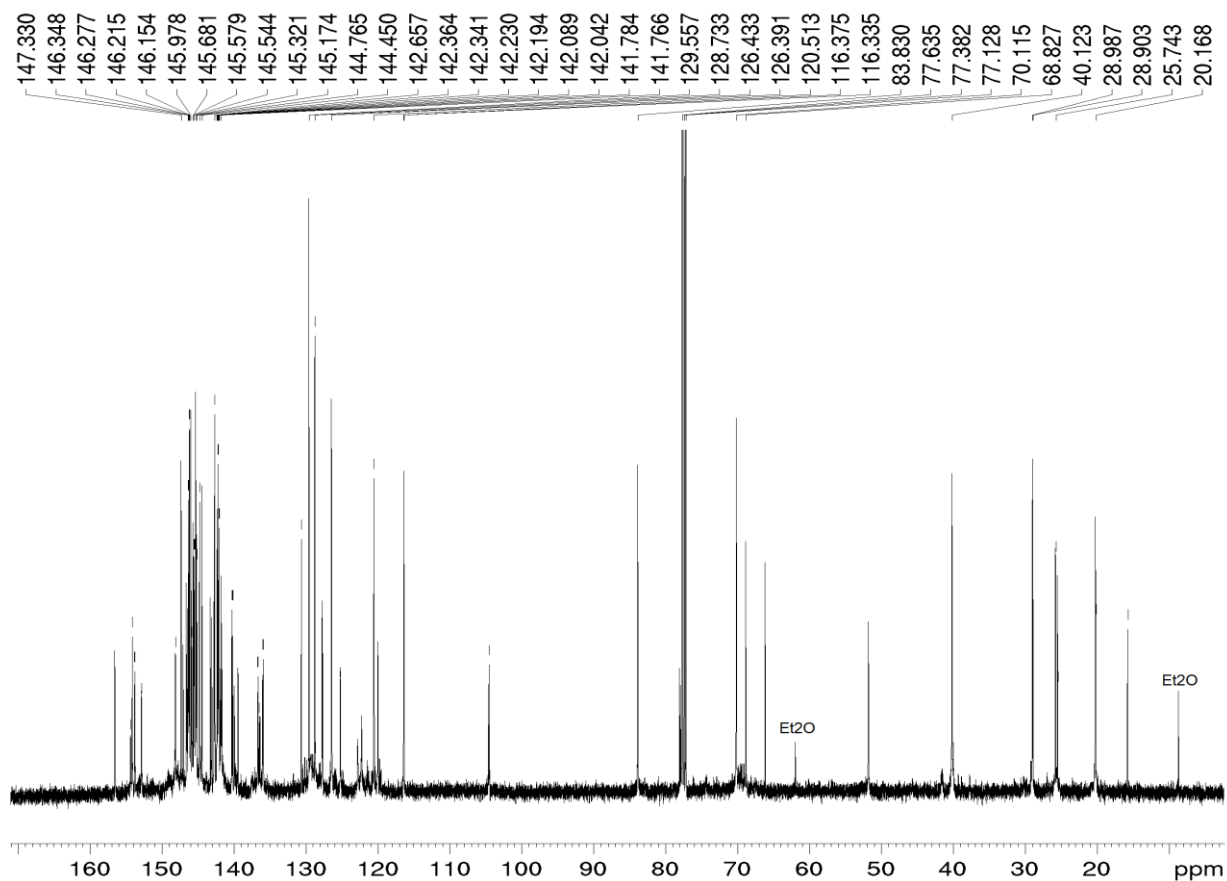

Figure 9. The  $^{13}\text{C}$  NMR spectrum of compound **5** (125.78 MHz, solvent  $\text{CS}_2 : \text{CDCl}_3 = 5:1$ )

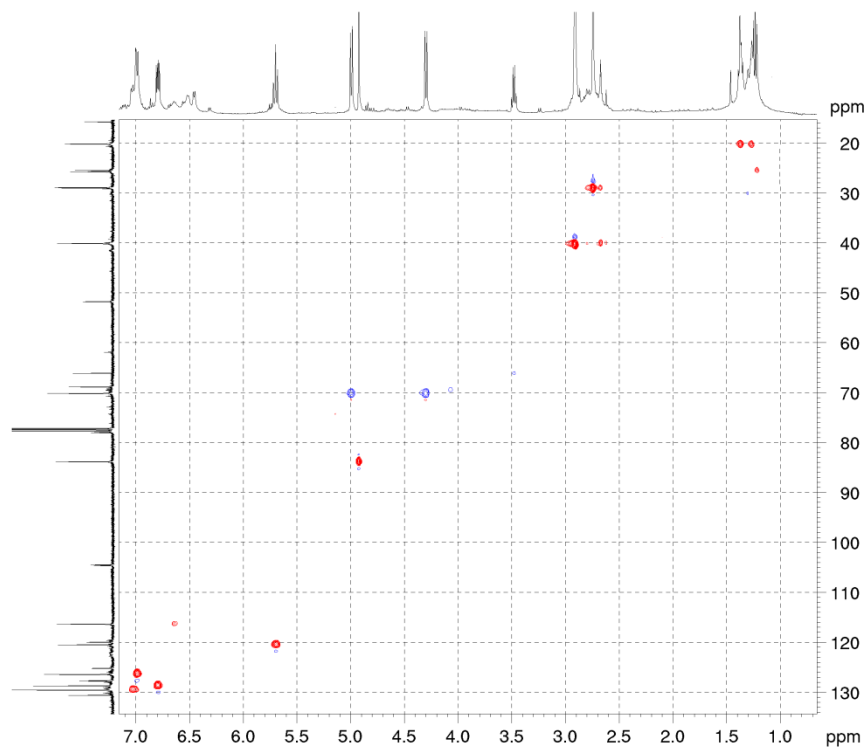

Figure 10. The HSQC spectrum of compound **5** (500.17 MHz for  $^1\text{H}$ , 125.78 MHz for  $^{13}\text{C}$ , solvent  $\text{CS}_2 : \text{CDCl}_3 = 5:1$ )

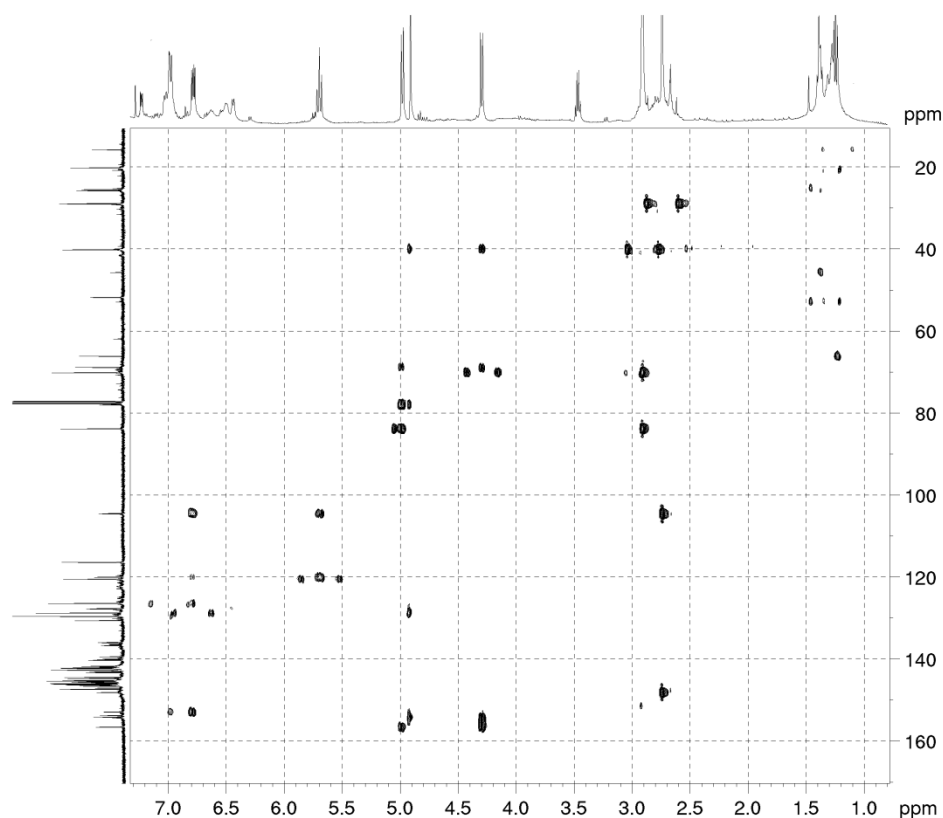

Figure 11. The HMBC spectrum of compound **5** (500.17 MHz for  $^1\text{H}$ , 125.78 MHz for  $^{13}\text{C}$ , solvent  $\text{CS}_2 : \text{CDCl}_3 = 5:1$ )

**Pyrrolidinofullerene 6.** IR: 526, 729, 935, 1179, 1251, 1463, 1485  $\text{cm}^{-1}$ . UV ( $\text{CHCl}_3$ ),  $\lambda_{\text{max}}$ , nm: 254, 326, 430.  $^1\text{H}$  NMR (500 MHz,  $\text{CDCl}_3$ ):  $\delta$  1.26 (s, 3H,  $\text{CH}_3$ ), 1.37 (s, 3H,  $\text{CH}_3$ ), 2.74 (s, 3H,  $\text{CH}_3$ ), 2.92 (s, 3H,  $\text{CH}_3$ , N-Me pyrrolidine), 4.30 (d, H,  $\text{CH}_2$ , pyrrolidine,  $J = 9.0$ ), 4.92 (s, 1H, CH, pyrrolidine), 4.99 (d, H,  $\text{CH}_2$ , pyrrolidine,  $J = 9.0$ ), 5.69 (d, 1H, CH, pyran,  $J = 10.0$ ), 6.44 (d, 1H, CH,  $J = 10.0$ ), 6.50 (d, 1H, CH, pyran,  $J = 10.0$ ), 6.72 (d, 1H, CH, indole,  $J = 8.0$ ), 6.79 (s, 1H, CH, indole), 6.80 (d, 1H, CH, indole,  $J = 8.0$ ), 6.81 (s, 1H, CH).  $^{13}\text{C}$  NMR (125 MHz,  $\text{CDCl}_3$ ):  $\delta$  20.23, 25.46, 25.74, 28.91, 28.99, 40.12, 51.67, 68.83, 70.13, 77.89, 78.02, 83.86, 104.17, 104.29, 112.69, 112.88, 115.86, 116.04, 116.23, 119.26, 119.31, 120.65, 127.63, 128.89, 135.91, 136.35, 136.49, 136.66, 139.42, 139.94, 139.96, 140.18, 140.29, 141.69, 141.78, 142.08, 142.22, 142.36, 142.66, 142.76, 143.07, 143.26, 143.28, 144.46, 144.77, 145.19, 145.33, 145.56, 145.69, 145.87, 145.98, 146.17, 146.35, 146.62, 147.06, 147.33, 148.18, 150.25, 153.76, 153.80, 154.13, 154.38, 155.64, 156.58, 157.55. MALDI TOF:  $m/z$  found 1069.1 [ $\text{M-H}$ ].

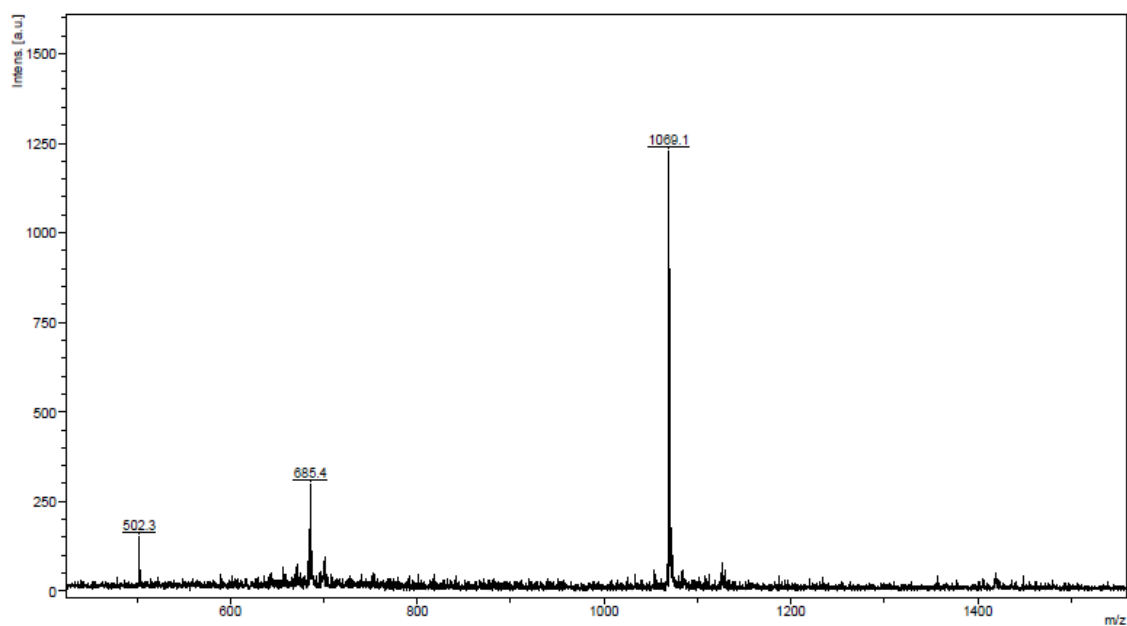

Figure 12. Mass spectra MALDI TOF of compound **6** (matrix – S<sub>8</sub>).

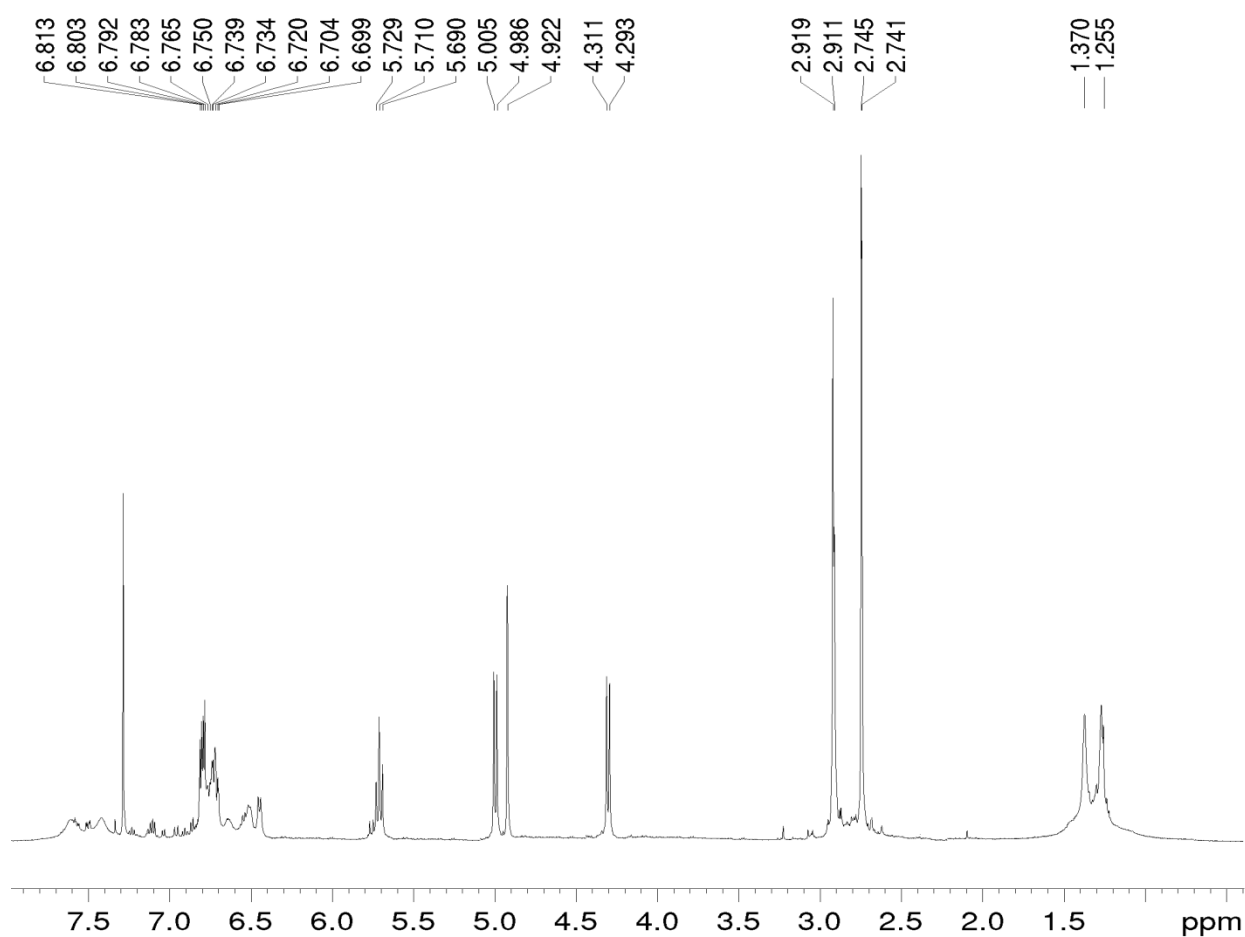

Figure 13. The <sup>1</sup>H NMR spectrum of compound **6** (500.17 MHz, solvent CS<sub>2</sub> : CDCl<sub>3</sub> = 5:1)

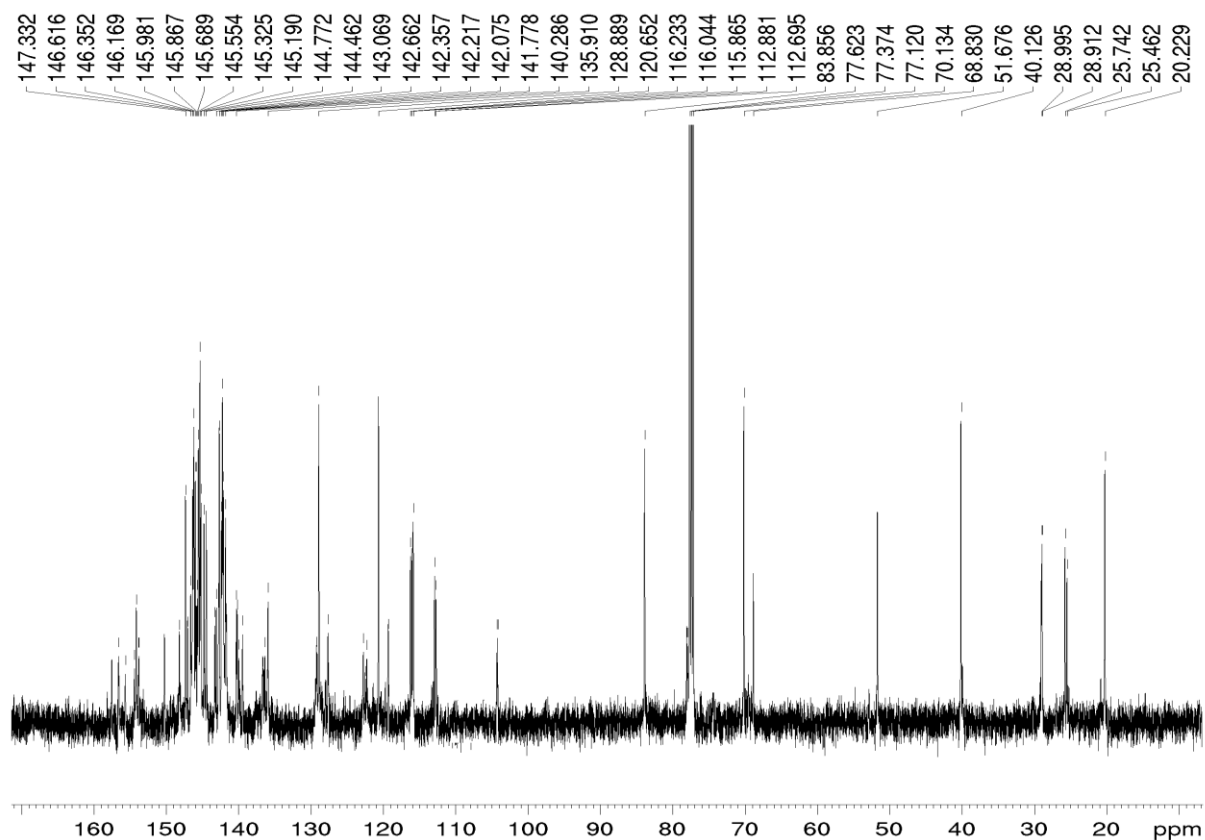

Figure 14. The  $^{13}\text{C}$  NMR spectrum of compound **6** (125.78 MHz, solvent  $\text{CS}_2 : \text{CDCl}_3 = 5:1$ )

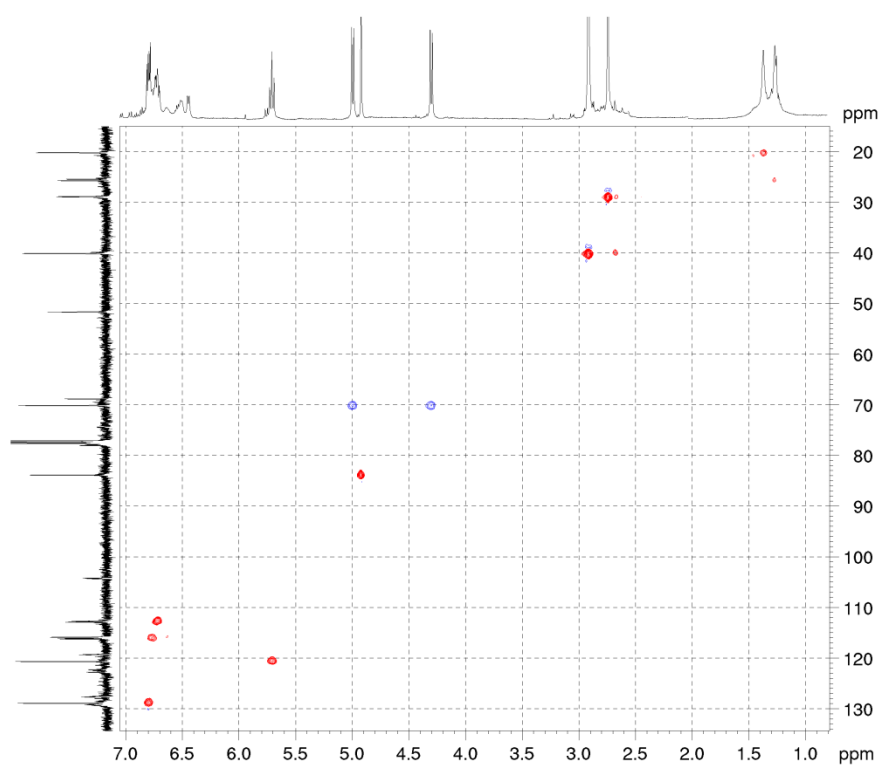

Figure 15. The HSQC spectrum of compound **6** (500.17 MHz for  $^1\text{H}$ , 125.78 MHz for  $^{13}\text{C}$ , solvent  $\text{CS}_2 : \text{CDCl}_3 = 5:1$ )

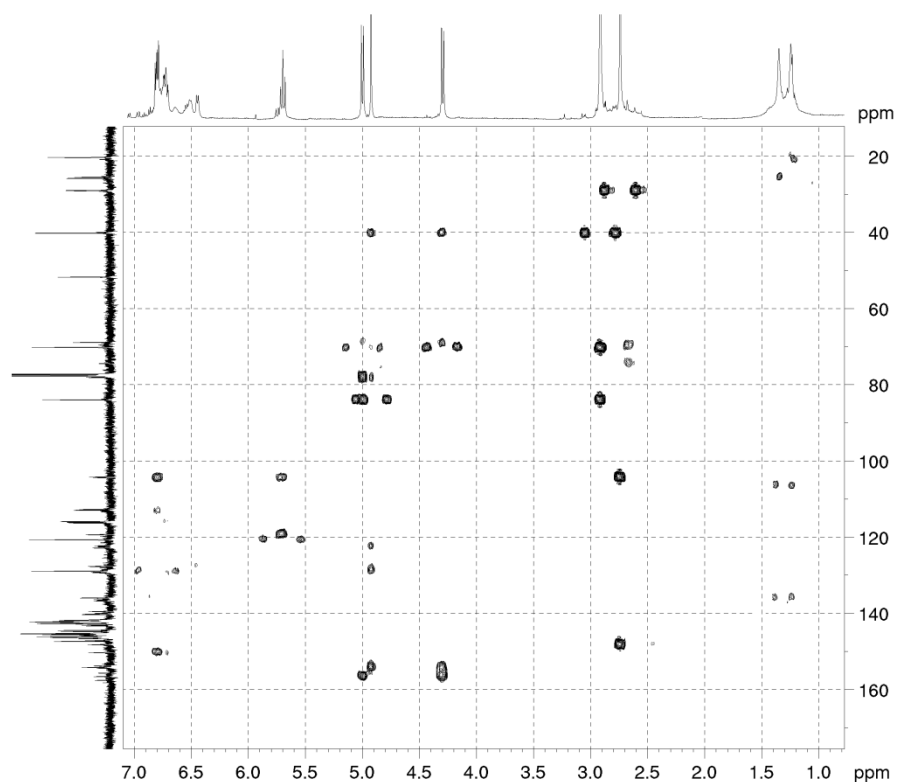

Figure 16. The HMBC spectrum of compound **6** (500.17 MHz for  $^1\text{H}$ , 125.78 MHz for  $^{13}\text{C}$ , solvent  $\text{CS}_2 : \text{CDCl}_3 = 5:1$ ).

### Spectral-kinetic studies.

Table 1. Spectral-kinetic characteristic of **1-6** in toluene and chloroform.

| Compound | Solvent            | $\lambda_{\text{A}}^{\text{max}}$ , nm | $\epsilon$ , $\text{M}^{-1}\cdot\text{sm}^{-1}$ | $\lambda_{\text{B}}^{\text{max}}$ , nm | $\Delta D_{\text{B}}^{\text{phot}}/D_{\text{A}}^{\text{max}}$ | $k_{\text{To}}^*$ , $\text{s}^{-1}$ | $\tau_{1/2}^{\text{phtdgr}}$ , s |
|----------|--------------------|----------------------------------------|-------------------------------------------------|----------------------------------------|---------------------------------------------------------------|-------------------------------------|----------------------------------|
| 1        | toluene            | 315                                    | -                                               | 580<br>620                             | 0.6                                                           | 0.10                                | 52                               |
| 4        | toluene            | 325                                    | 56250                                           | 610                                    | 0.4                                                           | 0,04                                | 143                              |
| 1        | chloroform         | 320                                    | 7750                                            | 595                                    | 0.3                                                           | 0.07                                | 21                               |
| 4        | chloroform         | 325                                    | 47500                                           | 590                                    | 0.2                                                           | 0.03                                | 57                               |
| 1        | amorphous<br>films | 330                                    | -                                               | 560                                    | 0.2                                                           | -                                   | -                                |

|   |                    |                   |       |     |      |       |     |
|---|--------------------|-------------------|-------|-----|------|-------|-----|
| 4 | amorphous<br>films | 213<br>257<br>325 | -     | 615 | 0.02 | -     | -   |
| 3 | toluene            | 315<br>390<br>580 | -     | 490 | 0.1  | 0.70  | 75  |
| 6 | toluene            | 320               | 50000 | -   | -    | -     | -   |
| 3 | chloroform         | 330<br>390<br>575 | 9000  | 540 | 0.2  | 0,27  | 120 |
| 6 | chloroform         | 320               | 46500 | -   | -    | -     | -   |
| 2 | toluene            | 320               | -     | 600 | 0.03 | 2,15  | 40  |
| 5 | toluene            | 320               | 43500 | -   | -    | -     | -   |
| 2 | chloroform         | 325<br>382        | 12750 | 505 | 0.4  | 0,002 | 325 |
| 5 | chloroform         | 320               | 21000 | -   | -    | -     | -   |

Note:  $\lambda_A^{\max}$  и  $\lambda_B^{\max}$  – maxima of absorption bands of initial spirane and photoinduced merocyanine forms spiropyrane of a fragment of a hybrid compound, respectively;  $\epsilon$ - a coefficient of molar extinction;  $\Delta OD_B^{\text{phot}}/OD_A^{\max}$  – a ratio of values of optical density at a maximum of the absorption band of the photoinduced merocyanine form of spiropyrane at a photoequilibrium state to the value of optical density in the maximum of the absorption band of the initial compounds;  $k_{\text{db}}$  – a rate constant of spontaneous bleaching the photoinduced merocyanine form at room temperature;  $\tau_{1/2}^{\text{pdegr}}$  – time of halving decreasing of the value of optical density at the maximum of the absorption band of the merocyanine form at constant irradiation by nonfiltered light. \*It was measured with precision up to 2,2 %.

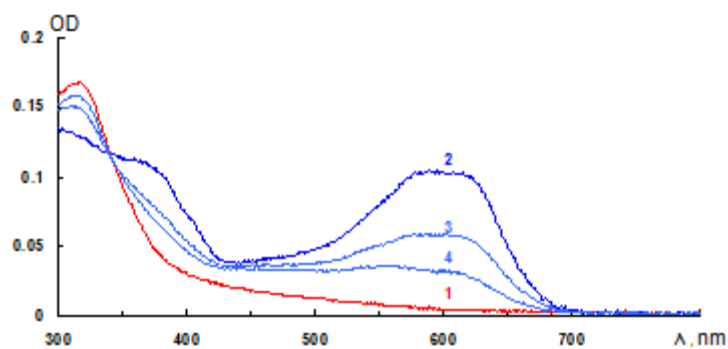

Figure 17. Absorption spectra of spiropyran **1** in toluene before exposure to radiation (1), during the irradiation through a UFS-1 optical filter (2), and after the subsequent bleaching in the dark (3,4,5).

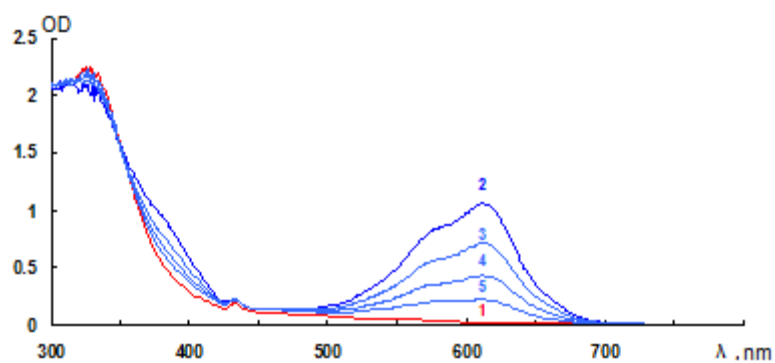

Figure 18. Absorption spectra of fulleropyrrolidine **4** in toluene before exposure to radiation (1), during the irradiation through a UFS-1 optical filter (2), and after the subsequent bleaching in the dark (3,4,5).

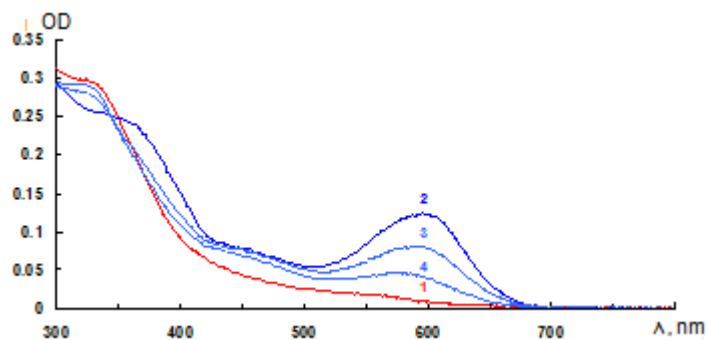

Figure 19. Absorption spectra of spiropyran **1** in chloroform before (1), during (2) the irradiation through a UFS-1 optical filter (2), and after the subsequent bleaching in the dark (3,4).

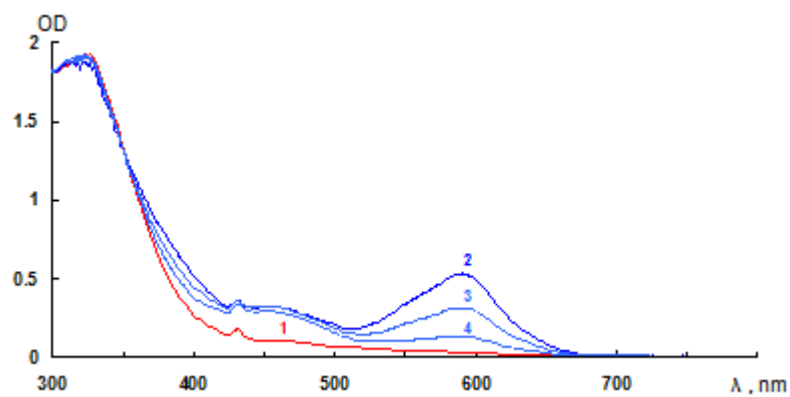

Figure 20. Absorption spectra of fulleropyrrolidine **4** in chloroform before (1), during (2) the irradiation through a UFS-1 optical filter (2), and after the subsequent bleaching in the dark (3,4).

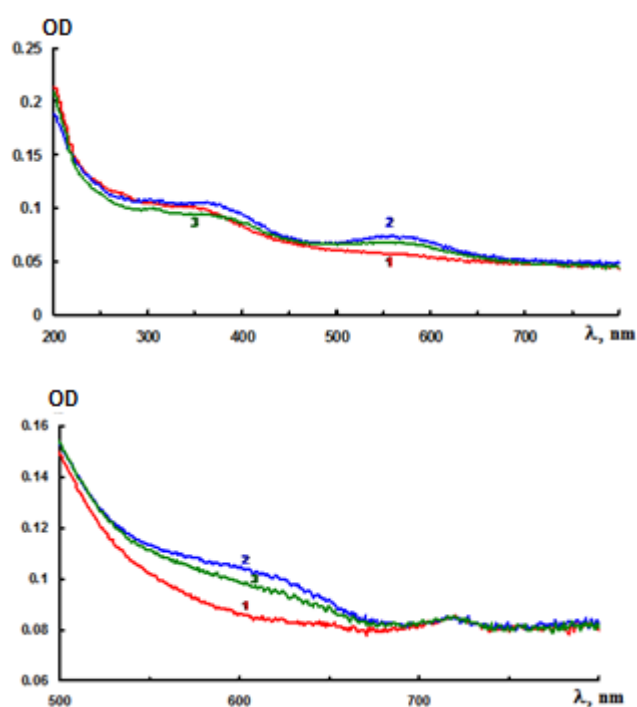

Figure 21. Absorption spectra of spiropyran **1** (above) and its hybrid compound with fullerene **4** (below) in amorphous films before (1) and after the exposure to unfiltered light (2), followed by dark relaxation for 1 hour (3).

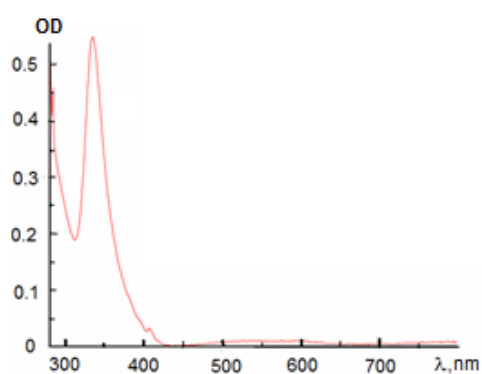

Figure 22. Absorption spectra of [60]fullerene in toluene



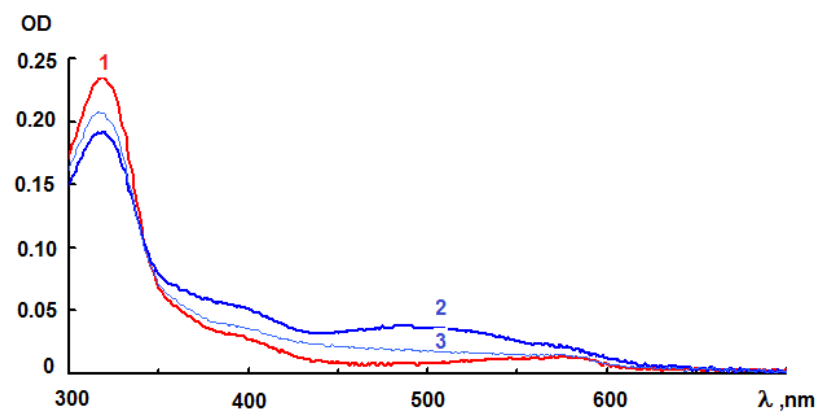

Figure 23. Absorption spectra of the compound **3** in toluene before (1), after UV irradiation through the UFS-1 optical filter (2) and after subsequent dark bleaching (3).

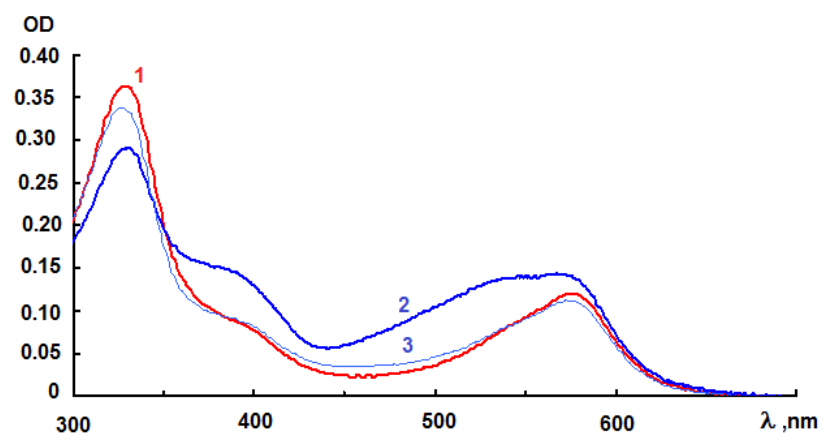

Figure 24. Absorption spectra of the compound **3** in chloroform before (1), after UV irradiation through the UFS-1 optical filter (2) and after subsequent dark bleaching (3).

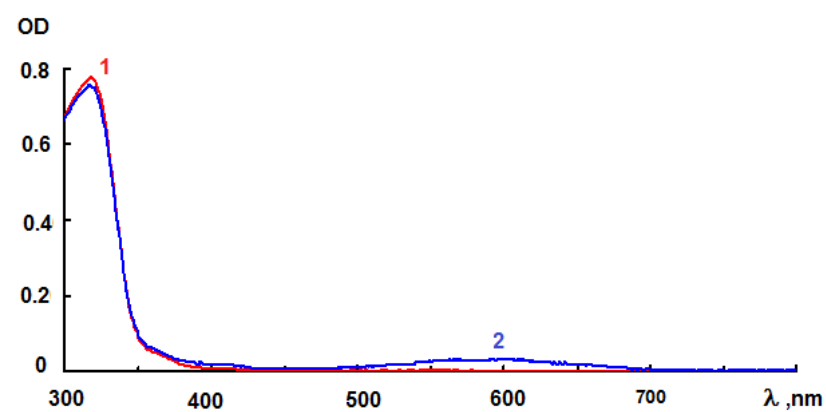

Figure 25. Absorption spectra of the compound **2** in toluene before (1), after UV irradiation through the UFS-1 optical filter (2).

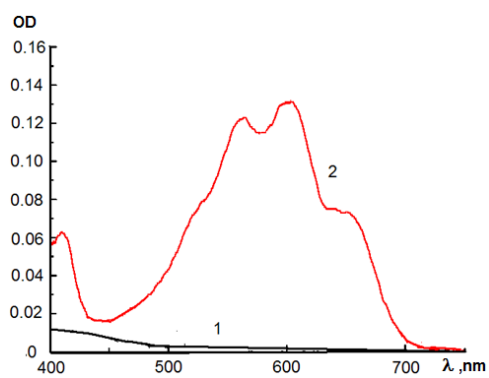

Figure 26. Absorption spectra the initial (1) and photoinduced (2) forms of compound **2** in toluene under pulse UV irradiation through the UFS – 1 optical filter.

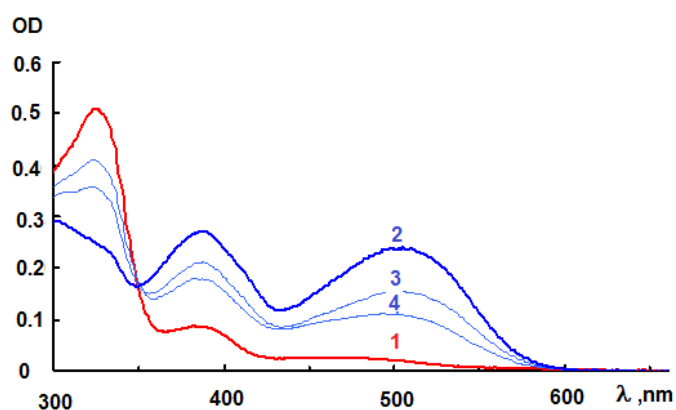

Figure 27. Absorption spectra of the compound **2** in chloroform before (1), after UV irradiation through the UFS-1 optical filter (2) and after subsequent dark bleaching (3,4).
